# Supplementary material for: Colorimetric detection of microRNA and RNase H activity in homogeneous solution with cationic polythiophene derivative
Source: Royal Society of Chemistry journal article supplement (doi:10.1039/b904579a), 2009-01-01
Supplement: b904579a.pdf [file b904579a.pdf]

## Supporting Information

### Colorimetric Detection of MicroRNA and RNase H Activity in Homogeneous Solution with Cationic Polythiophene Derivative

Yali Zhang,<sup>a,b</sup> Zhengping Li,\*<sup>a</sup> Yongqiang Cheng<sup>a</sup> and Xuechong Lv<sup>a</sup>

<sup>a</sup>Key Laboratory of Medical Chemistry and Molecular Diagnosis, Ministry of Education; College of Chemistry and Environmental Science, Hebei University, Baoding 071002, Hebei Province, P. R. China. Email: [lzpbd@hbu.edu.cn](mailto:lzpbd@hbu.edu.cn); Fax: +86 312 5079403

<sup>b</sup>College of Sciences, Hebei University of Science and Technology, Shijiazhuang050018, Hebei Province, P. R. China,

## Experimental Section

### Materials and Reagents

Cationic water-soluble poly [3-(3'-N, N, N-triethylamino-1-propyloxy)-4-methyl-2, 5-thiophene hydrochloride] (PMNT) was prepared from an oxidative polymerization in chloroform with FeCl<sub>3</sub> as the oxidizing agent according to the procedure in the literatures<sup>1</sup>. RNase H and PAGE-purified DNA and HPLC-purified miRNA oligonucleotides were obtained from TaKaRa Biotechnology Co., Ltd (Dalian, China). The sequences are as follows:

miRNA(let-7a): 5'-UgAggUAgUAggUUgUAUAgUU-3'

complementary DNA: 5'-AACTATAACAACCTACTACCTCA-3'

one-base mismatch DNA: 5'-AACTATAACAACgTACTACCTCA-3'

three-base mismatch DNA: 5'-AACTACACACAACgTACTTCCCTCA-3'

non-complement DNA: 5'-CATgTgAgTgAATTgATgAATC-3'

The mismatched bases in the DNAs are underlined. The concentration of oligonucleotides was determined by measuring the absorbance at 260nm in 160  $\mu$ L quartz cuvette. All the DNA and RNA solutions were prepared with DEPC-treated water. The buffer used is purchased from TaKaRa Biotechnology Co., Ltd (Dalian, China). The reaction temperatures were controlled by a Biometra T1 Thermal Cycler (Germany). UV-vis absorption spectra were measured with a TU-1901 spectrophotometer (Purkjinie General Instrument Co., Ltd., Beijing, China).

**Assay for miRNA:** 1.2  $\mu$ L complementary DNA ( $1.0 \times 10^{-4}$  M) and a certain amount of the miRNA were added into 100  $\mu$ L buffer (50 mM Tris-HCl, 75 mM KCl, 3 mM MgCl<sub>2</sub>, 10 mM DTT,

pH 8.3) in a 200  $\mu\text{L}$  PCR microtube. The mixture solution was then heated at  $70^\circ\text{C}$  for 3 min,  $55^\circ\text{C}$  for 1.5 h. After cooling to room temperature, 3.0  $\mu\text{L}$  PMNT ( $1.0 \times 10^{-3}$  M) was added and mixed. The UV-vis absorption spectra were measured in a 200  $\mu\text{L}$  quartz cuvette at room temperature.

**Digestion of miRNA in the DNA/miRNA hybrids by RNase H:** 1.2  $\mu\text{L}$  complementary DNA ( $1.0 \times 10^{-4}$  M), miRNA ( $1.0 \times 10^{-4}$  M) were added into 100  $\mu\text{L}$  buffer (50 mM Tris-HCl, 75 mM KCl, 3 mM  $\text{MgCl}_2$ , 10 mM DTT, pH 8.3) in a 200  $\mu\text{L}$  PCR microtube. The mixture solution was then heated at  $70^\circ\text{C}$  for 3 min,  $55^\circ\text{C}$  for 1.5 h. After cooling to room temperature, RNase H was added, the mixed solution was incubated for 10 min at  $30^\circ\text{C}$ . After cooling, 3.0  $\mu\text{L}$  PMNT ( $1.0 \times 10^{-3}$  M) was added. The UV-vis absorption spectra were measured in a 200  $\mu\text{L}$  quartz cuvette at room temperature.

**Characteristics of the UV-vis absorption spectra of miRNA/PMNT and DNA/PMNT duplexes:** As demonstrated in the text of this paper, after hybridization between miRNA and its complementary DNA and digestion by RNase H, the miRNA in the miRNA/DNA hybrids is specifically digested. The released single strand (ss) DNA combines with PMNT to form DNA/PMNT duplex. The absorbance of DNA/PMNT at 400 nm ( $A_{400\text{ nm}}$ ) decreases and  $A_{525\text{ nm}}$  increases compared to PMNT itself (Figure S1, a and b). When miRNA and PMNT form miRNA/PMNT duplex, as shown in Figure S1, d, the  $A_{400\text{ nm}}$  of miRNA/PMNT duplex greatly increases and exhibits greater absorbance at longer wavelength than that of PMNT. When miRNA mixes with non-complementary DNA, the miRNA can not be digested by RNase H due to no hybridization between miRNA and non-complementary DNA. Therefore, the DNA/PMNT and miRNA/PMNT duplexes can be respectively formed in the solution. miRNA/PMNT duplexes show increased absorbance at 400 nm. As a result, the UV-vis absorption spectrum of the mixture of miRNA/PMNT and DNA/PMNT has much lower absorbance ratio of 525 nm to 400 nm than that of DNA/PMNT duplex.

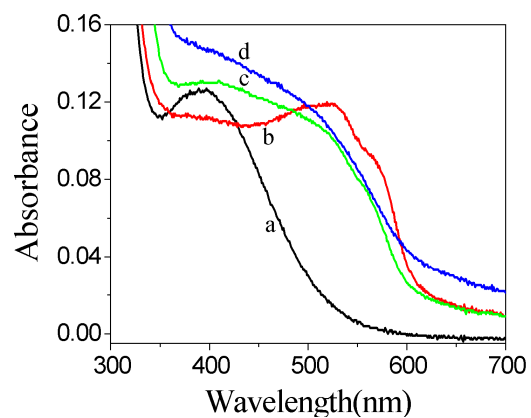

Figure S1. UV-vis absorption spectra of PMNT (a); (miRNA/complementary DNA+RNase H)/PMNT (b) ; (miRNA/non-complementary DNA+RNase H)/PMNT (c) and miRNA/PMNT. [PMNT]=30  $\mu$ M in RUs, [DNA]=[miRNA]=1.2  $\mu$ M, RNase H: 3Unit.

1 H. A. Ho, M. Boissinot, M. G. Bergeron, G. Corbeil, K. Dore, D. Boudreau, M. Leclerc, *Angew. Chem. Int. Ed.* 2002, **41**, 1548-1551.
